# Supplementary material
Source: PubMed Central journal article supplement (PMC4918752)
Supplement: NIHMS795945-supplement-eTable.pdf [file NIHMS795945-supplement-eTable.pdf]

## Supplementary Online Content

DeVoe JE, Marino M, Angier H, et al. Effect of expanding Medicaid for parents on children's health insurance coverage: lessons from the Oregon Experiment randomized trial. *JAMA Pediatr*. Published online January 5, 2015. doi:10.1001/jamapediatrics.2014.3145.

**eTable.** Generalized estimating equation odds ratios for the effect of (i) parent selection to apply for Oregon Health Plan (OHP) coverage and (ii) selected parent(s) obtained OHP coverage on child OHP coverage for >50% of the time period, stratified by number of parent registrants

This supplementary material has been provided by the authors to give readers additional information about their work.

**eTable.** Generalized estimating equation odds ratios for the effect of (i) parent selection to apply for Oregon Health Plan (OHP) coverage and (ii) selected parent(s) obtained OHP coverage on child OHP coverage for >50% of the time period, stratified by number of parent registrants

| TIME PERIOD – POST SELECTION                        |      |                                      |             |                                      |             |                                      |             |
|-----------------------------------------------------|------|--------------------------------------|-------------|--------------------------------------|-------------|--------------------------------------|-------------|
|                                                     |      | MONTHS 1-6                           |             | MONTHS 7-12                          |             | MONTHS 13-18                         |             |
|                                                     |      | children covered by OHP <sup>a</sup> |             | children covered by OHP <sup>a</sup> |             | children covered by OHP <sup>a</sup> |             |
|                                                     |      | % <sup>b</sup>                       | OR (95% CI) | % <sup>b</sup>                       | OR (95% CI) | % <sup>b</sup>                       | OR (95% CI) |
| <b>(i) Intent-to-treat<sup>c</sup></b>              |      |                                      |             |                                      |             |                                      |             |
| <b>1 Parent Registrant: Unadjusted</b>              |      |                                      |             |                                      |             |                                      |             |
| Parent selected                                     | 62.3 | 1.16 (1.07-1.25)                     | 59.4        | 1.08 (1.00-1.17)                     | 59.7        | 1.04 (0.97-1.12)                     |             |
| Parent not selected                                 | 58.8 | Ref.                                 | 57.5        | Ref.                                 | 58.7        | Ref.                                 |             |
| <b>1 Parent Registrant: Adjusted<sup>d</sup></b>    |      |                                      |             |                                      |             |                                      |             |
| Parent selected                                     | 62.6 | 1.17 (1.08-1.26)                     | 59.7        | 1.09 (1.01-1.17)                     | 59.9        | 1.05 (0.97-1.13)                     |             |
| Parent not selected                                 | 59.0 | Ref.                                 | 57.6        | Ref.                                 | 58.8        | Ref.                                 |             |
| <b>2 Parent Registrants: Unadjusted</b>             |      |                                      |             |                                      |             |                                      |             |
| Parent selected                                     | 76.4 | 1.21 (1.01-1.45)                     | 74.0        | 1.22 (1.02-1.46)                     | 73.9        | 1.15 (0.96-1.37)                     |             |
| Parent not selected                                 | 72.8 | Ref.                                 | 69.9        | Ref.                                 | 71.1        | Ref.                                 |             |
| <b>2 Parent Registrants: Adjusted<sup>d</sup></b>   |      |                                      |             |                                      |             |                                      |             |
| Parent selected                                     | 77.6 | 1.26 (1.04-1.51)                     | 75.2        | 1.27 (1.06-1.52)                     | 75.0        | 1.19 (0.99-1.43)                     |             |
| Parent not selected                                 | 73.4 | Ref.                                 | 70.5        | Ref.                                 | 71.6        | Ref.                                 |             |
| <b>(ii) Per-protocol<sup>e</sup></b>                |      |                                      |             |                                      |             |                                      |             |
| <b>1 Parent Registrant: Unadjusted</b>              |      |                                      |             |                                      |             |                                      |             |
| Parent selected and gained OHP coverage             | 71.9 | 2.15 (1.92-2.41)                     | 66.5        | 1.68 (1.51-1.88)                     | 65.4        | 1.48 (1.32-1.65)                     |             |
| Parent not selected and did not gain OHP coverage   | 54.4 | Ref.                                 | 54.1        | Ref.                                 | 56.2        | Ref.                                 |             |
| <b>1 Parent Registrant: Adjusted<sup>d</sup></b>    |      |                                      |             |                                      |             |                                      |             |
| Parent selected and obtained OHP coverage           | 72.6 | 2.22 (1.98-2.49)                     | 67.1        | 1.73 (1.54-1.93)                     | 66.0        | 1.51 (1.35-1.69)                     |             |
| Parent not selected and did not obtain OHP coverage | 54.4 | Ref.                                 | 54.1        | Ref.                                 | 56.2        | Ref.                                 |             |
| <b>2 Parent Registrants: Unadjusted</b>             |      |                                      |             |                                      |             |                                      |             |
| Parent selected and obtained OHP coverage           | 86.9 | 3.01 (2.33-3.90)                     | 80.1        | 2.05 (1.62-2.58)                     | 78.6        | 1.66 (1.31-2.08)                     |             |
| Parent not selected and did not obtain OHP coverage | 68.7 | Ref.                                 | 66.2        | Ref.                                 | 69.0        | Ref.                                 |             |
| <b>2 Parent Registrants: Adjusted<sup>d</sup></b>   |      |                                      |             |                                      |             |                                      |             |
| Parent selected and obtained OHP coverage           | 87.8 | 3.15 (2.43-4.08)                     | 81.1        | 2.11 (1.66-2.68)                     | 79.7        | 1.69 (1.33-2.14)                     |             |
| Parent not selected and did not obtain OHP coverage | 69.7 | Ref.                                 | 67.1        | Ref.                                 | 69.9        | Ref.                                 |             |

OR: odds ratio; CI: confidence interval; OHP: Oregon Health Plan [Oregon's Medicaid program]

<sup>a</sup> A child was classified as covered if there was evidence of OHP coverage for >50% of the days in the time period.

<sup>b</sup> The unadjusted percentages are the observed percentage; the adjusted percentages are estimated from predicted probability of coverage from the models.

c To estimate the effect parental selection status had on children's coverage, we used generalized estimating equation (GEE) modeling, limited to 18 months after a parent was selected to apply for OHP (those not selected were randomly assigned a selection date, based on the distribution of selection dates for the selected group).

d Adjusted for covariates found to be significantly different between selected and not selected groups, including: parent's race/ethnicity, number of children in the household, number of parents in the household on the reservation list, Rural-Urban Continuum Code for the child's zip code, whether either parent registrant from the reservation list were probabilistically matched to OCHIN EHR data. Missing parental race/ethnicity was included in the models as a separate category with the parental race/ethnicity variable.

e To estimate the effect of a parent being selected and obtaining coverage, we used generalized estimating equation (GEE) modeling, limited to children whose parents were selected and received OHP coverage in the first 6 months after the selection date (intervention group), and children whose parents were not selected and did not get OHP coverage in the first 6 months post-selection (controls).
